# Supplementary material for: Determination of the Active Pharmaceutical Ingredients in Saridon Tablets Using an Economical and Sensitive Thin Layer Chromatography Method Combined with Densitometry
Source: MDPI journal article supplement (doi:10.3390/analytica5010001), 2024-01-02
Supplement: s1 [file s1]

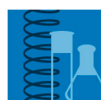

Table S1. Chromatographic conditions tested

| No | Stationary phase              | Mobile phase                                                      | Volume composition of mobile phase |
|----|-------------------------------|-------------------------------------------------------------------|------------------------------------|
| 1  | RP18W do HPTLC                | acetonitrile + buffer pH=5.0                                      | 22.5:77.5                          |
| 2  | Silica gel 60F <sub>254</sub> | acetone + chloroform + ammonia                                    | 10 : 40: 0.5                       |
| 3  | Silica gel 60F <sub>254</sub> | n-hexane + acetone + ammonia                                      | 25 : 25: 0.5                       |
| 4  | Silica gel 60F <sub>254</sub> | chloroform + toluene + ethyl acetate + methanol + acetic acid 80% | 6:6:1:2:0.1                        |
| 5  | Silica gel 60F <sub>254</sub> | chloroform + toluene + ethyl acetate + methanol + acetic acid 80% | 6:6:2:2:0.1                        |
| 6  | Silica gel 60F <sub>254</sub> | chloroform + toluene + ethyl acetate + ethanol + acetic acid 80%  | 6:6:6:2:0.2                        |
| 7  | Silica gel 60F <sub>254</sub> | chloroform + toluene + ethyl acetate + ethanol + acetic acid 80%  | 18: 18: 7.5: 5.0: 0.3              |
| 8  | Silica gel 60F <sub>254</sub> | chloroform + toluene + ethyl acetate + ethanol + acetic acid 80%  | 3:3:3:2:0.1                        |
| 9  | Silica gel 60F <sub>254</sub> | chloroform + toluene + ethyl acetate + ethanol + acetic acid 80%  | 6:6:2:2:0.1                        |
| 10 | Silica gel 60F <sub>254</sub> | chloroform + toluene + ethyl acetate + ethanol + acetic acid 80%  | 1:3:3:2:0.1                        |
| 11 | Silica gel 60F <sub>254</sub> | chloroform + toluene + ethyl acetate + ethanol + acetic acid 80%  | 3:1:3:2:0.2                        |
| 12 | Silica gel 60F <sub>254</sub> | chloroform + toluene + ethyl acetate + ethanol + acetic acid 80%  | 3:3:3:2:0.1                        |
| 13 | Silica gel 60F <sub>254</sub> | chloroform + toluene + ethyl acetate + ethanol + acetic acid 80%  | 6:6:2:2 :0.1                       |
| 14 | Silica gel 60F <sub>254</sub> | chloroform + toluene + ethyl acetate + ethanol + acetic acid 80%  | 6:6:2.5:2:0.1                      |
| 15 | Silica gel 60F <sub>254</sub> | chloroform + toluene + ethyl acetate + ethanol + acetic acid 80%  | 5.5:6:2.5:2:0.1                    |
| 16 | Silica gel 60F <sub>254</sub> | chloroform + toluene + ethyl acetate + ethanol + acetic acid 80%  | 2:3:3:2:0.1                        |
| 17 | Silica gel 60F <sub>254</sub> | chloroform + toluene + ethyl acetate + ethanol + acetic acid 80%  | 1:3:2:2:0.1                        |
| 18 | Silica gel 60F <sub>254</sub> | chloroform + toluene + ethyl acetate + ethanol + acetic acid 80%  | 2:3:2:2:0.1                        |
| 19 | Silica gel 60F <sub>254</sub> | chloroform + toluene + ethyl acetate + ethanol + acetic acid 80%  | 1:3:1.5:2:0.1                      |

|    |                               |                                                                       |                 |
|----|-------------------------------|-----------------------------------------------------------------------|-----------------|
| 20 | Silica gel 60F <sub>254</sub> | chloroform + toluene + ethyl acetate + ethanol + acetic acid 80%      | 6:6:2.5:1.5:0.1 |
| 21 | Silica gel 60F <sub>254</sub> | chloroform + toluene + ethyl acetate + ethanol + acetic acid 80%      | 6:6:2:2:0.1     |
| 22 | Silica gel 60F <sub>254</sub> | chloroform + toluene + ethyl acetate + methanol + glacial acetic acid | 6:6:1:2:0.1     |

**Table S2.** The factors and their levels investigated in robustness test.

| Symbol         | Factors                              | Method<br>Condition | Levels |      |
|----------------|--------------------------------------|---------------------|--------|------|
|                |                                      |                     | +      | -    |
| X <sub>1</sub> | Temperature of plate activation [°C] | 120                 | 130    | 110  |
| X <sub>2</sub> | Extraction time [min]                | 30                  | 31     | 29   |
| X <sub>3</sub> | Saturation time of the chamber [°C]  | 15                  | 18     | 12   |
| X <sub>4</sub> | Volume of chloroform [mL]            | 18.0                | 18.2   | 17.8 |
| X <sub>5</sub> | Volume of toluene [mL]               | 18.0                | 18.2   | 17.8 |
| X <sub>6</sub> | Volume of ethyl acetate [mL]         | 7.5                 | 7.6    | 7.4  |
| X <sub>7</sub> | Volume of ethanol [mL]               | 2.0                 | 2.1    | 1.9  |

**Table S3** Experimental design matrix (2<sup>3</sup>) for robustness test.

| Experiment No | X <sub>1</sub> | X <sub>2</sub> | X <sub>3</sub> | X <sub>4</sub> | X <sub>5</sub> | X <sub>6</sub> | X <sub>7</sub> |
|---------------|----------------|----------------|----------------|----------------|----------------|----------------|----------------|
| 1             | +              | +              | +              | +              | +              | +              | +              |
| 2             | +              | +              | -              | +              | -              | -              | -              |
| 3             | +              | -              | +              | -              | -              | +              | -              |
| 4             | +              | -              | -              | -              | +              | -              | +              |
| 5             | -              | +              | +              | -              | +              | -              | -              |
| 6             | -              | +              | -              | -              | -              | +              | +              |
| 7             | -              | -              | +              | +              | -              | -              | +              |
| 8             | -              | -              | -              | +              | +              | +              | -              |

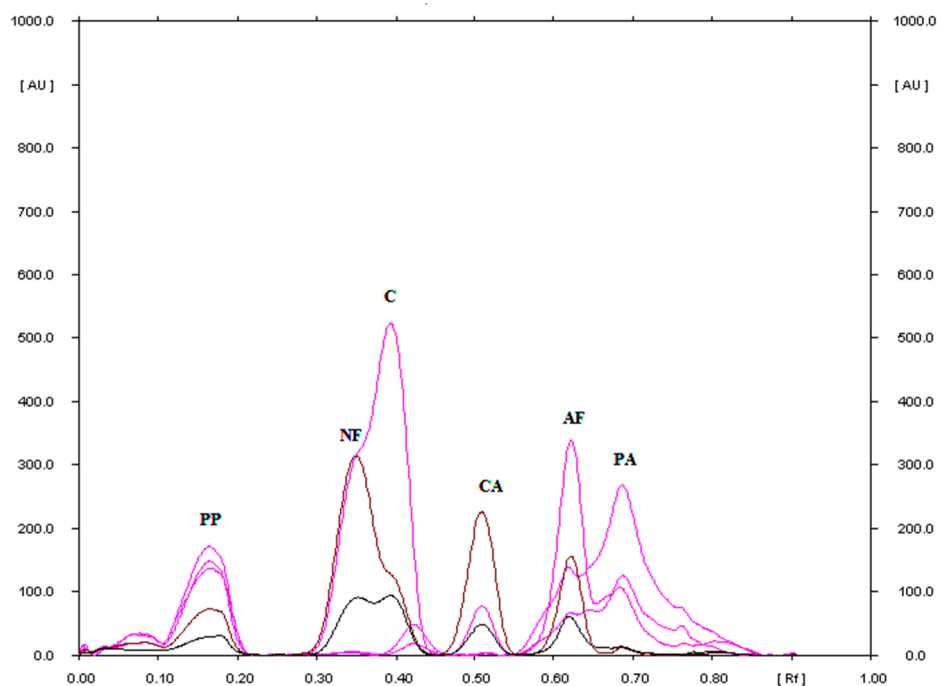

**Figure S1.** Densitogram of a mixture of standard substances: propyphenazone (PP), paracetamol (PA), caffeine (C), 4-chloroacetanilide (CA), 4-aminophenol (AF), and 4-nitrophenol (NF) made in the range of 250–350 nm, using RP18W plate and mobile phase: acetonitrile + buffer pH=5.0 (22.5:77.5, v/v).

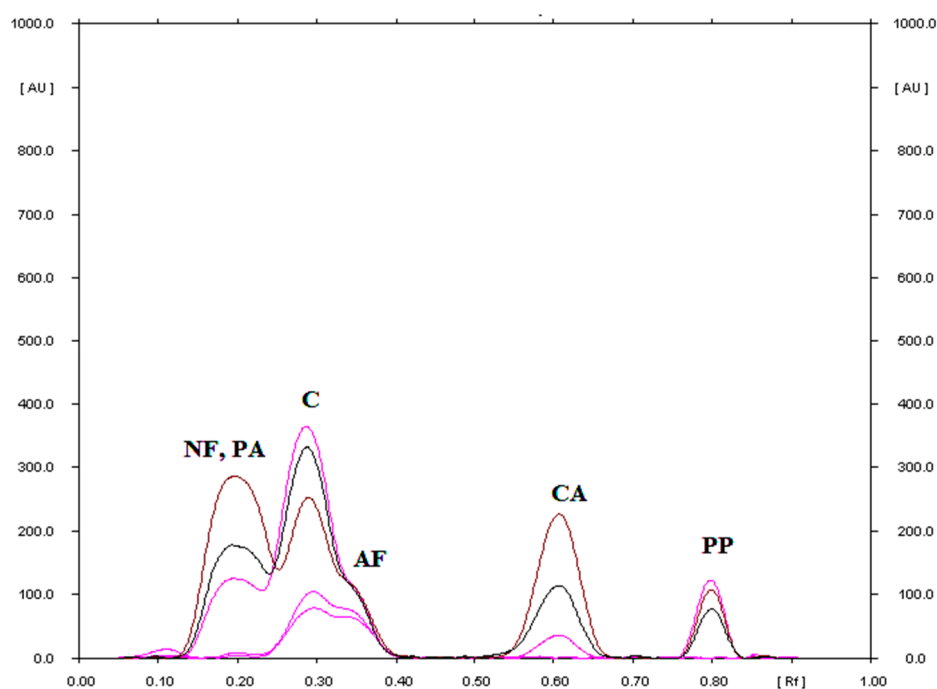

**Figure S2.** Densitogram of a mixture of standard substances: propyphenazone (PP), paracetamol (PA), caffeine (C), 4-chloroacetanilide (CA), 4-aminophenol (AF), and 4-nitrophenol (NF) made in the range of 250–350 nm, using silica gel 60F<sub>254</sub> plate and mobile phase: acetone + chloroform + ammonia (10 : 40: 0.5, v/v).

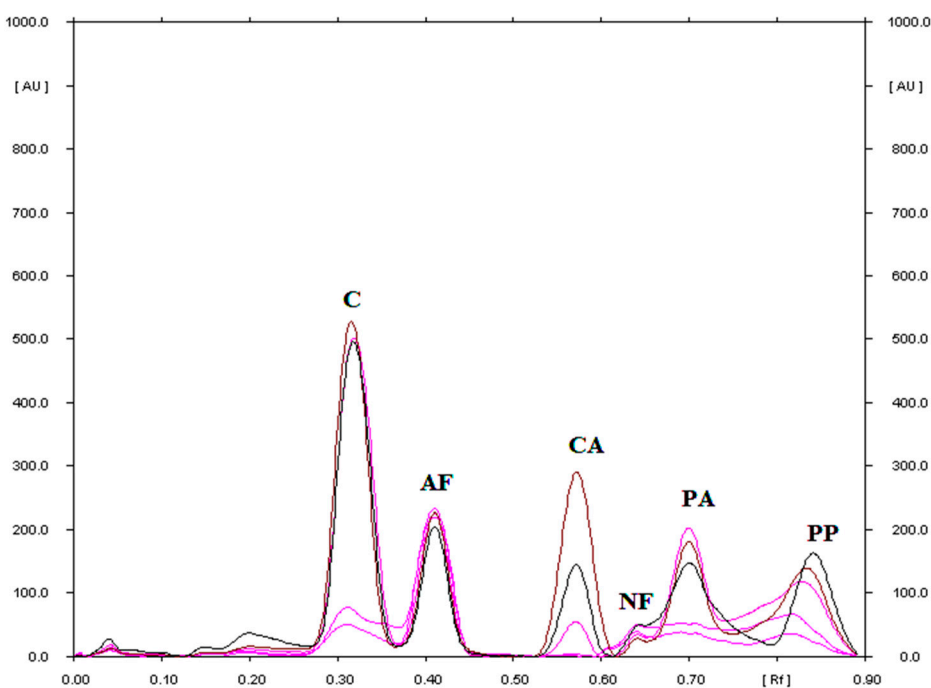

**Figure S3.** Densitogram of a mixture of standard substances: propyphenazone (PP), paracetamol (PA), caffeine (C), 4-chloroacetanilide (CA), 4-aminophenol (AF), and 4-nitrophenol (NF) made in the range of 250–350 nm, using silica gel 60F<sub>254</sub> plate and mobile phase: *n*-hexane + acetone + ammonia (25 : 25: 0.5, v/v).

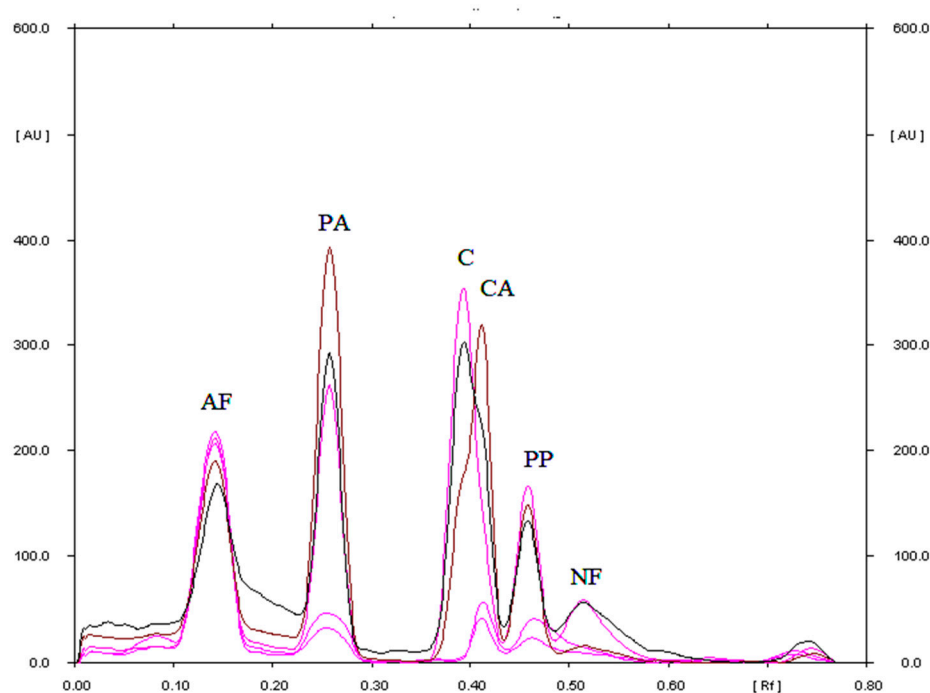

**Figure S4.** Densitogram of a mixture of standard substances: propyphenazone (PP), paracetamol (PA), caffeine (C), 4-chloroacetanilide (CA), 4-aminophenol (AF), and 4-nitrophenol (NF) made in the range of 250–350 nm, using silica gel 60F<sub>254</sub> plate and mobile phase: chloroform + toluene + ethyl acetate + methanol + acetic acid 80% (6:6:1:2:0.1, v/v).

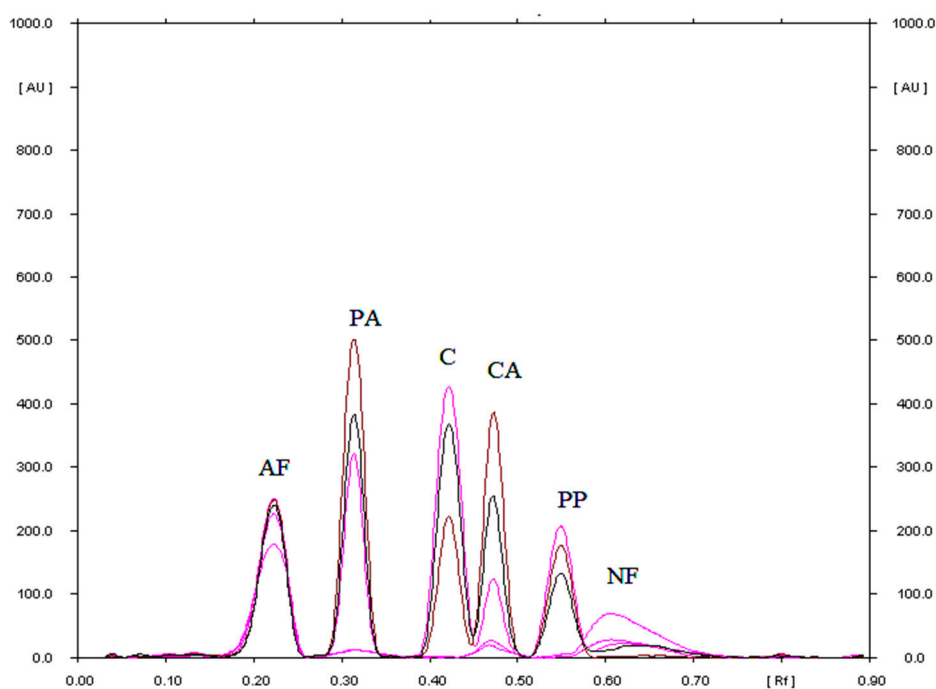

**Figure S5.** Densitogram of a mixture of standard substances: propyphenazone (PP), paracetamol (PA), caffeine (C), 4-chloroacetanilide (CA), 4-aminophenol (AF), and 4-nitrophenol (NF) made in the range of 250–350 nm, using silica gel 60F<sub>254</sub> plate and mobile phase: chloroform + toluene + ethyl acetate + methanol + acetic acid 80% (6:6:2:2:0.1, v/v).

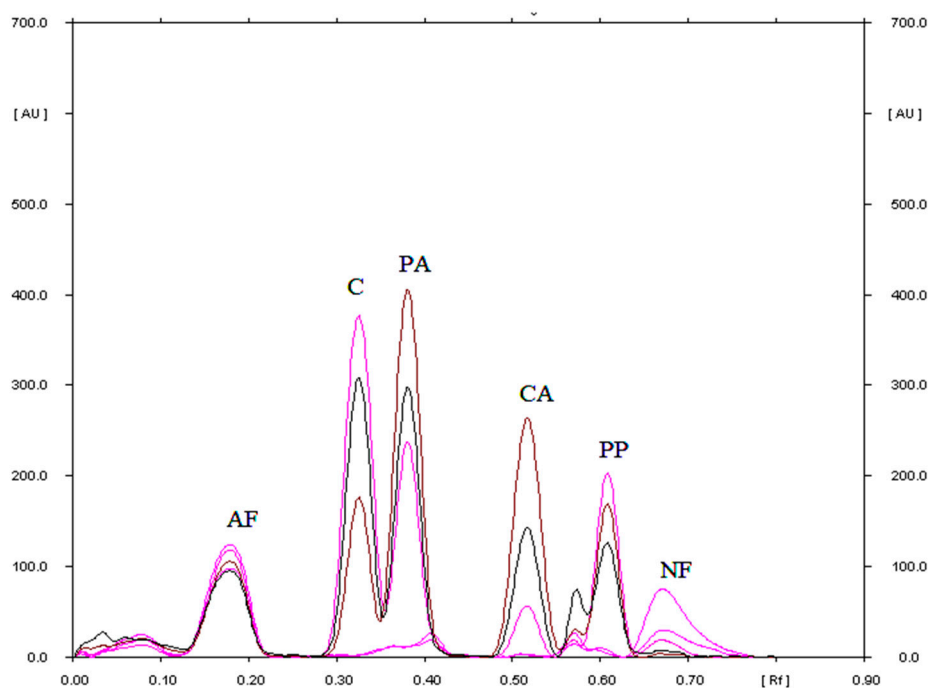

**Figure S6.** Densitogram of a mixture of standard substances: propyphenazone (PP), paracetamol (PA), caffeine (C), 4-chloroacetanilide (CA), 4-aminophenol (AF), and 4-nitrophenol (NF) made in the range of 250–350 nm, using silica gel 60F<sub>254</sub> plate and mobile phase: chloroform + toluene + ethyl acetate + ethanol + acetic acid 80% (6:6:6:2:0.2, v/v).

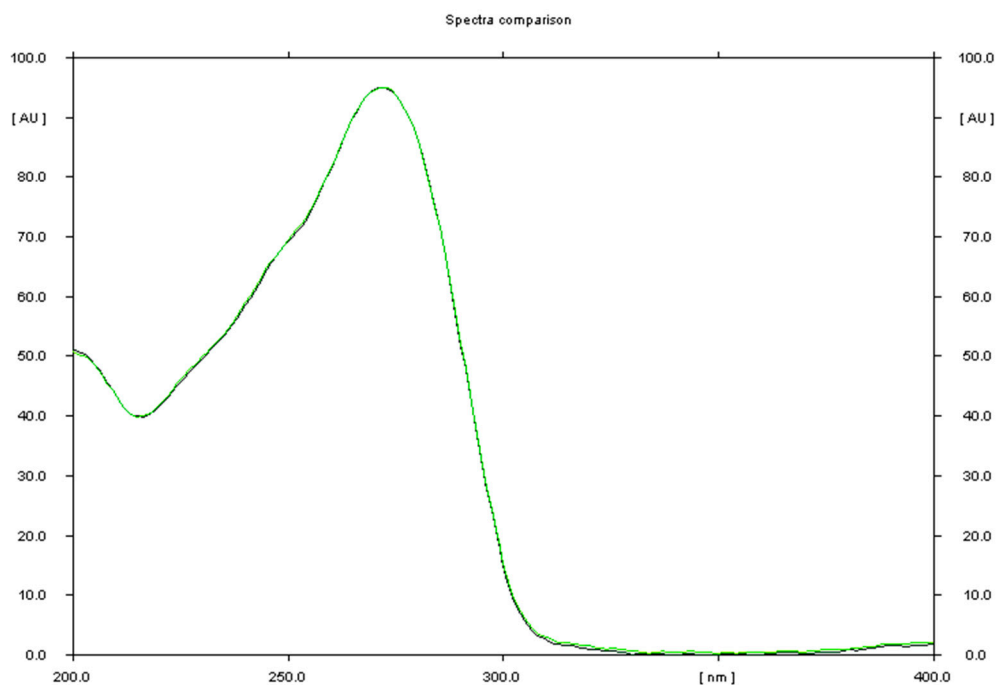

**Figure S7.** Comparison of the spectrodensitogram obtained for the standard substance propyphenazone with the spectrodensitogram obtained for propyphenazone, the source of which was sample of Saridon.

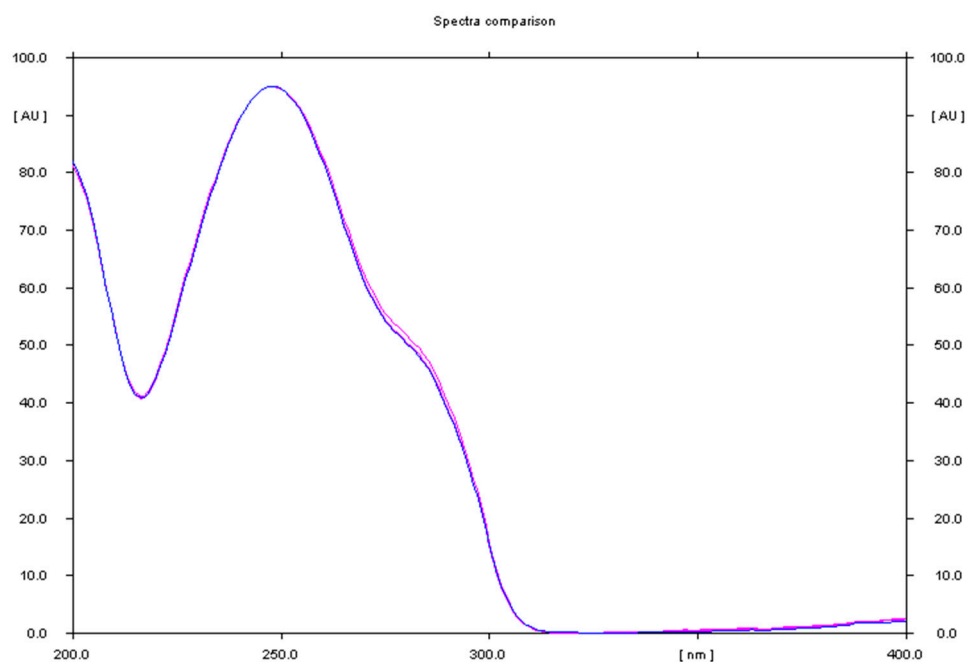

**Figure S8.** Comparison of the spectrodensitogram obtained for the standard substance paracetamol with the spectrodensitogram obtained for paracetamol, the source of which was sample of Saridon

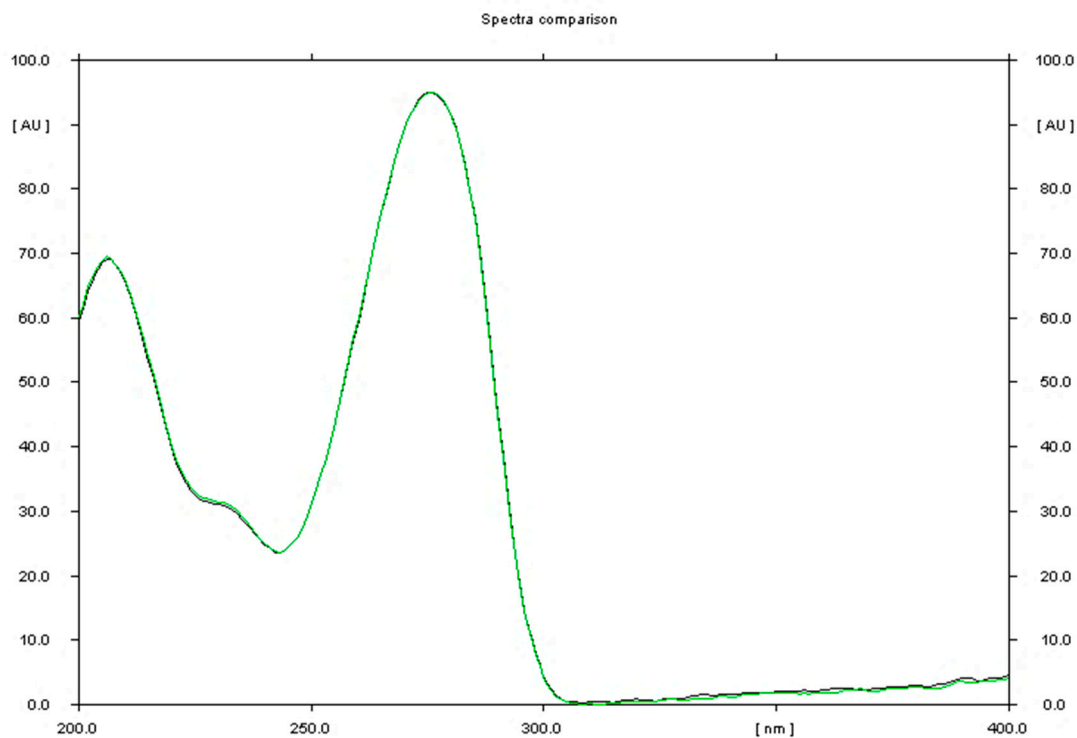

**Figure S9.** Comparison of the spectrodensitogram obtained for the standard substance caffeine with the spectrodensitogram obtained for caffeine, the source of which was sample of Saridon

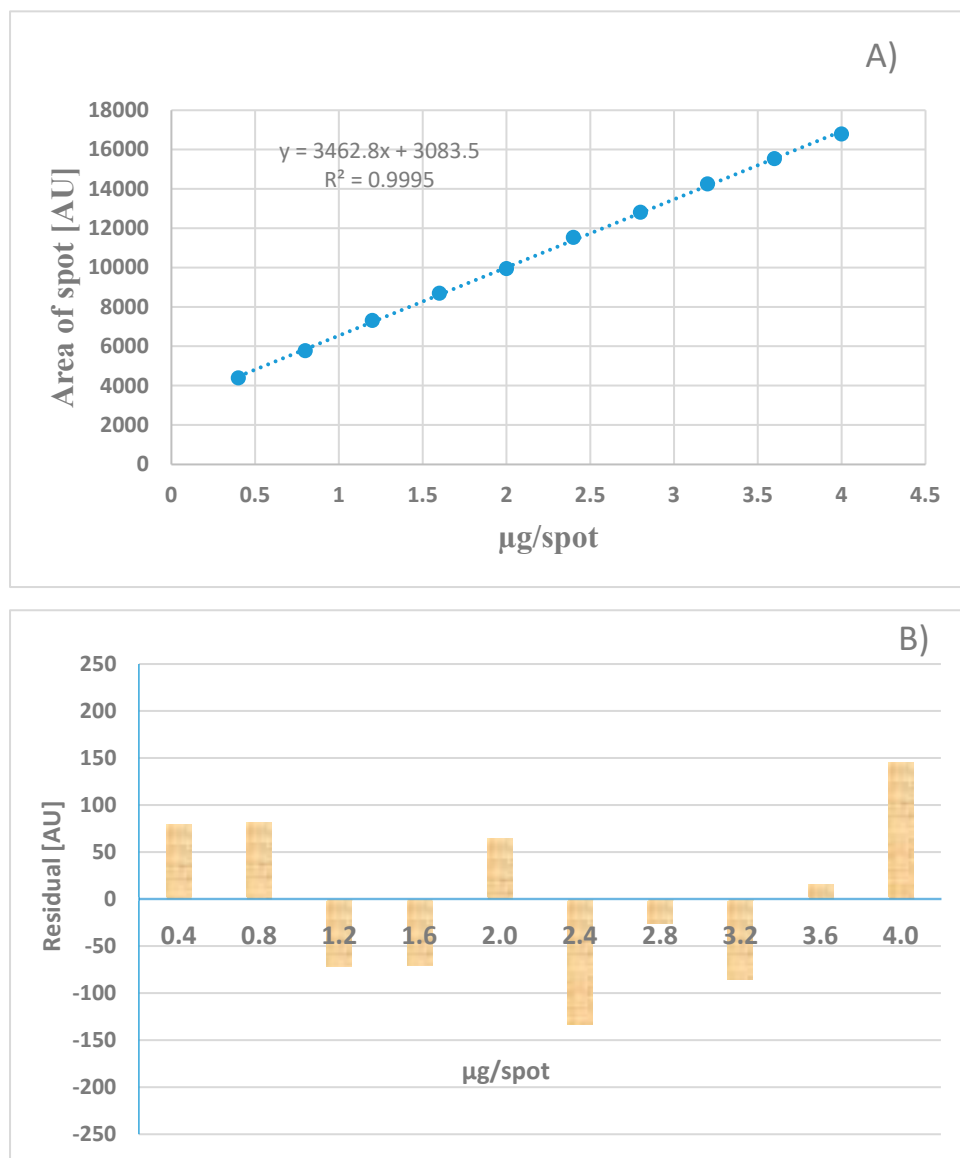

**Figure S10.** Calibration plot (A) and plot of residuals (B) for paracetamol (PA) in the linear working range mobile phase: chloroform + toluene + ethyl acetate + ethanol + acetic acid (80%) in a volume ratio of 18: 18: 7.5: 5.0: 0.3.



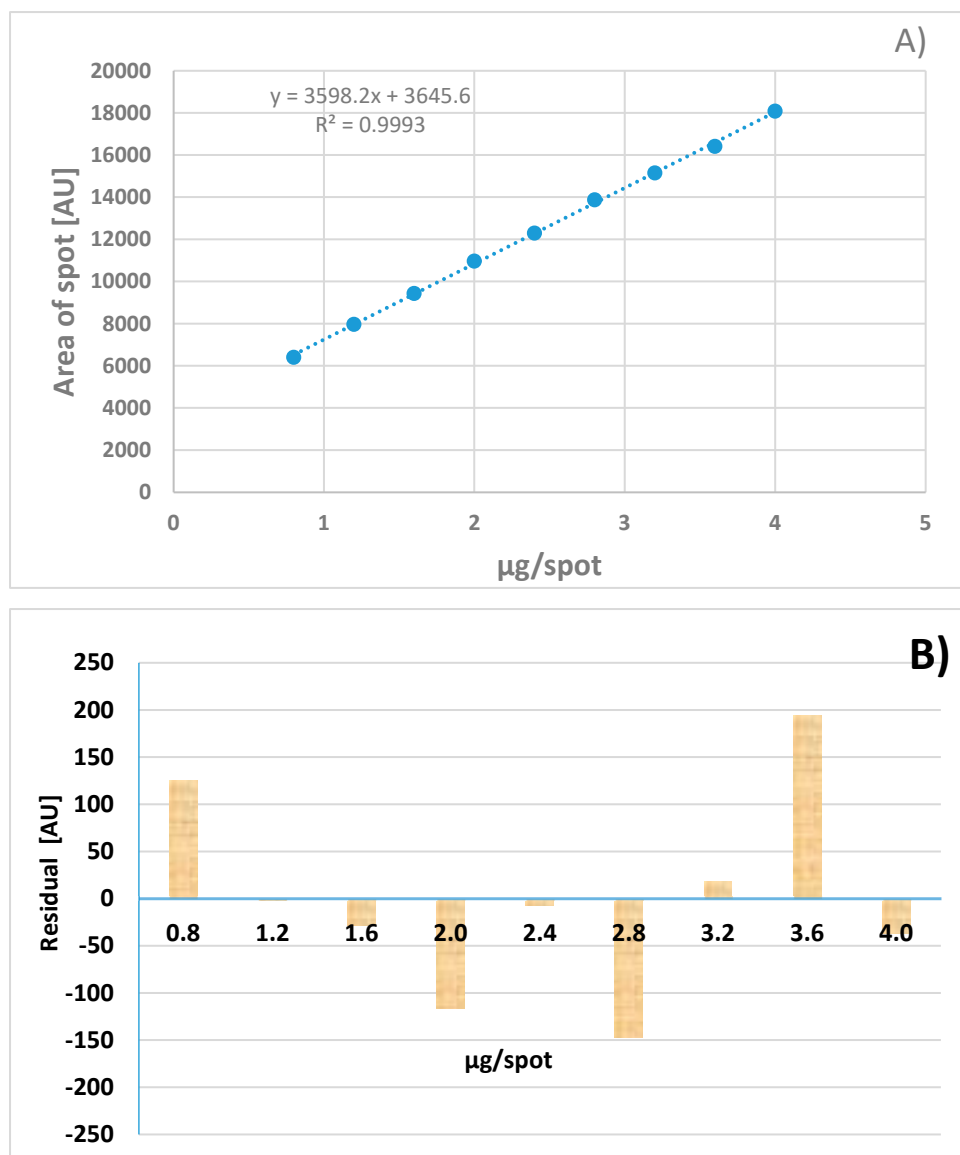

**Figure S11.** Calibration plot (A) and plot of residuals (B) for propyphenazone (PP) in the linear working range mobile phase: chloroform + toluene + ethyl acetate + ethanol + acetic acid (80%) in a volume ratio of 18: 18: 7.5: 5.0: 0.3.

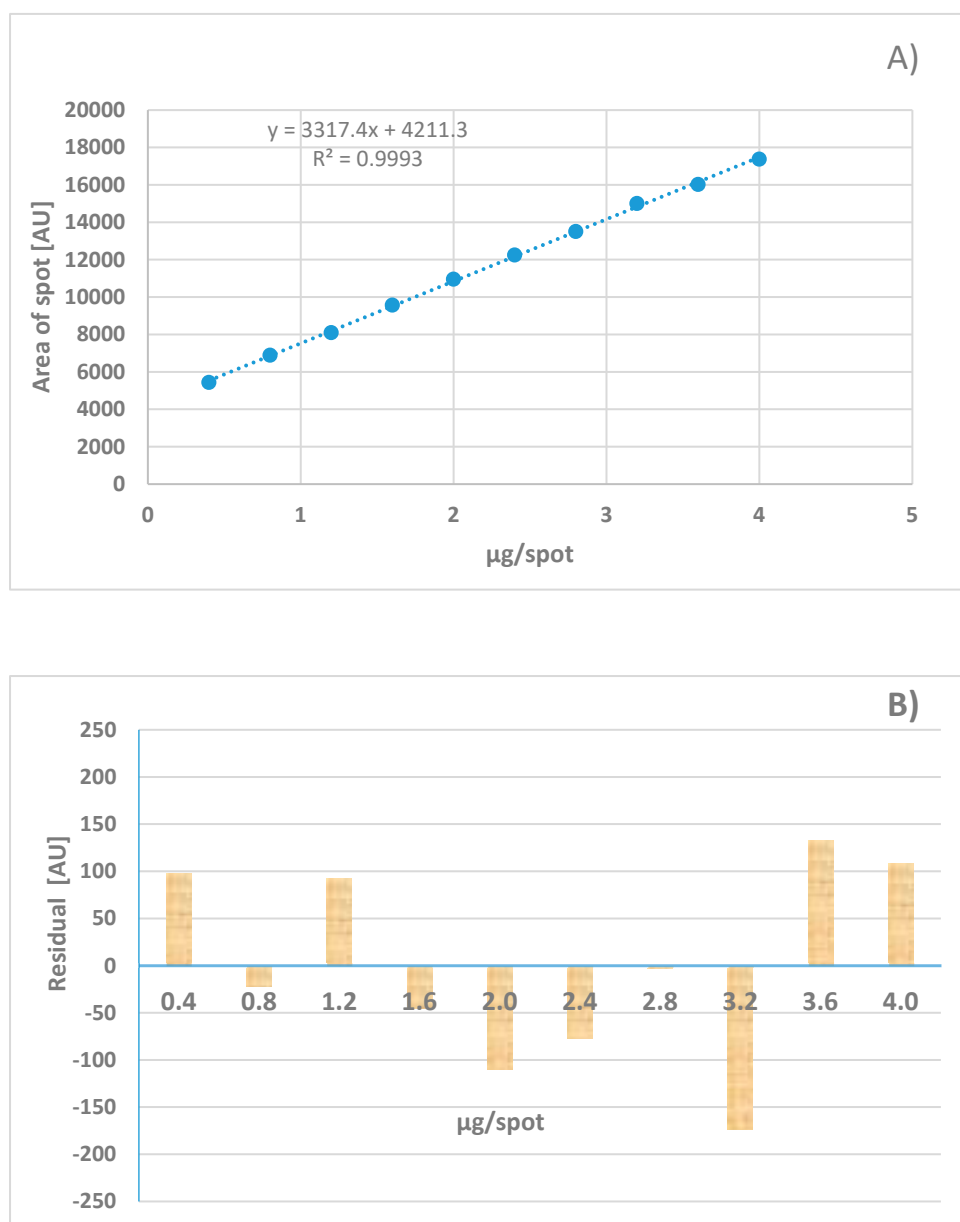

**Figure S12.** Calibration plot (A) and plot of residuals (B) for caffeine (C) in the linear working range mobile phase: chloroform + toluene + ethyl acetate + ethanol + acetic acid (80%) in a volume ratio of 18: 18: 7.5: 5.0: 0.3.

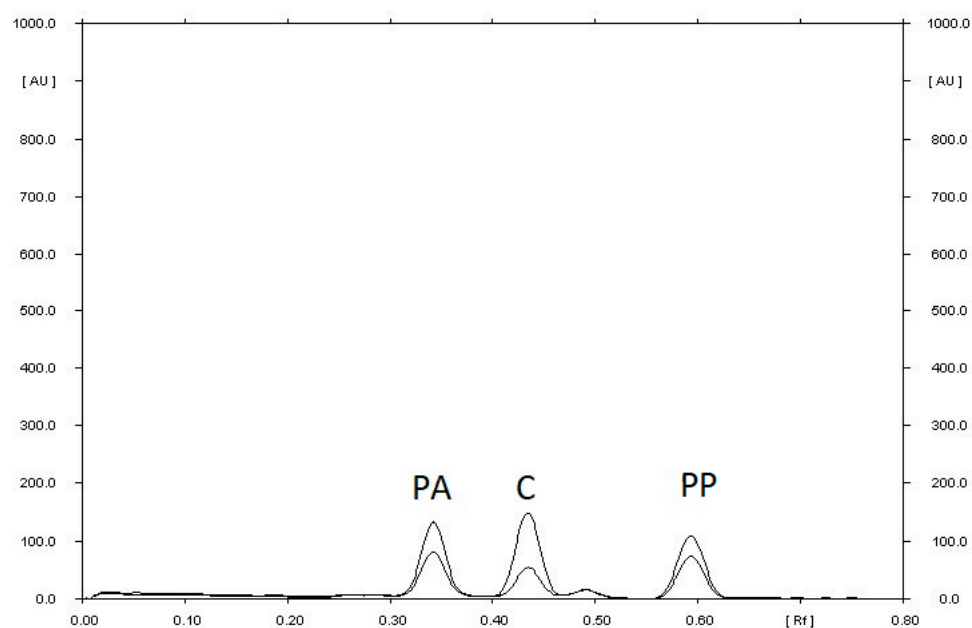

**Figure S13.** Densitogram of standard mixture of PA, C, PP (each standard about concentration 0.20 µg/spot).

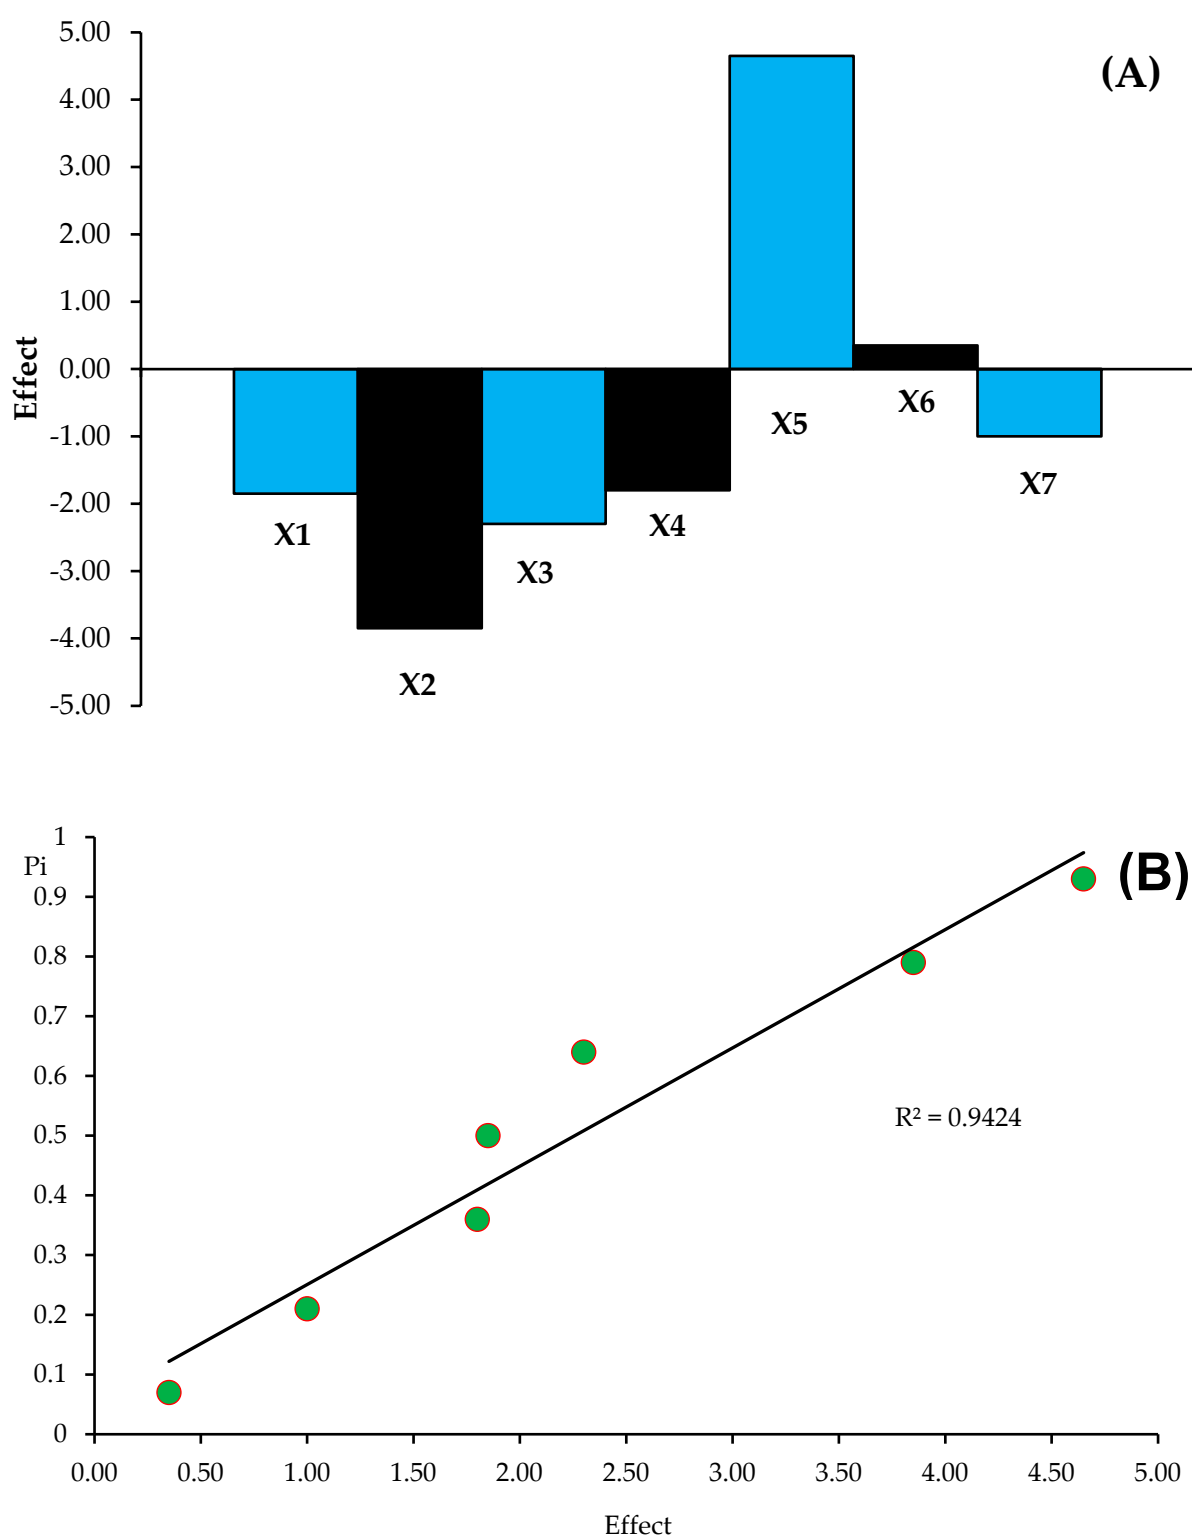

**Figure S14.** Robustness test: the effects of factors (A), and half-normal probability plot of effects (B) for determination of paracetamol (PA) in Saridon tablets.

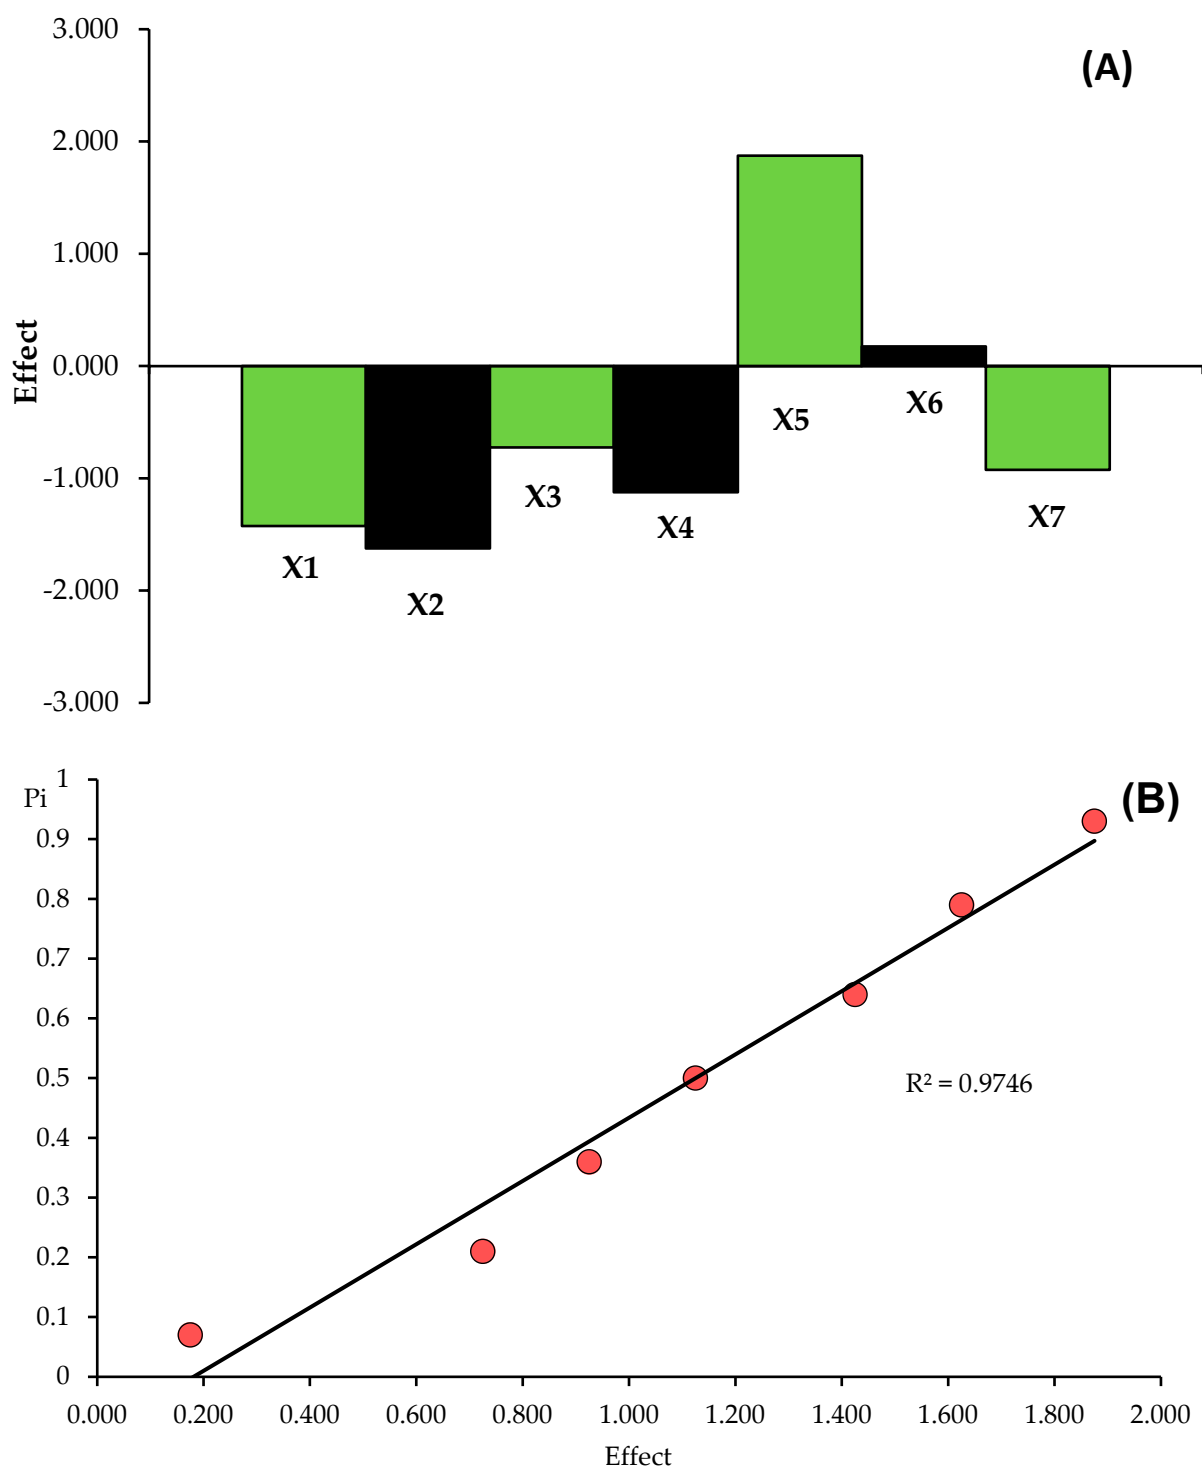

**Figure S15.** Robustness test: the effects of factors (A), and half-normal probability plot of effects (B) for determination of propyphenazone (PP) in Saridon tablets.

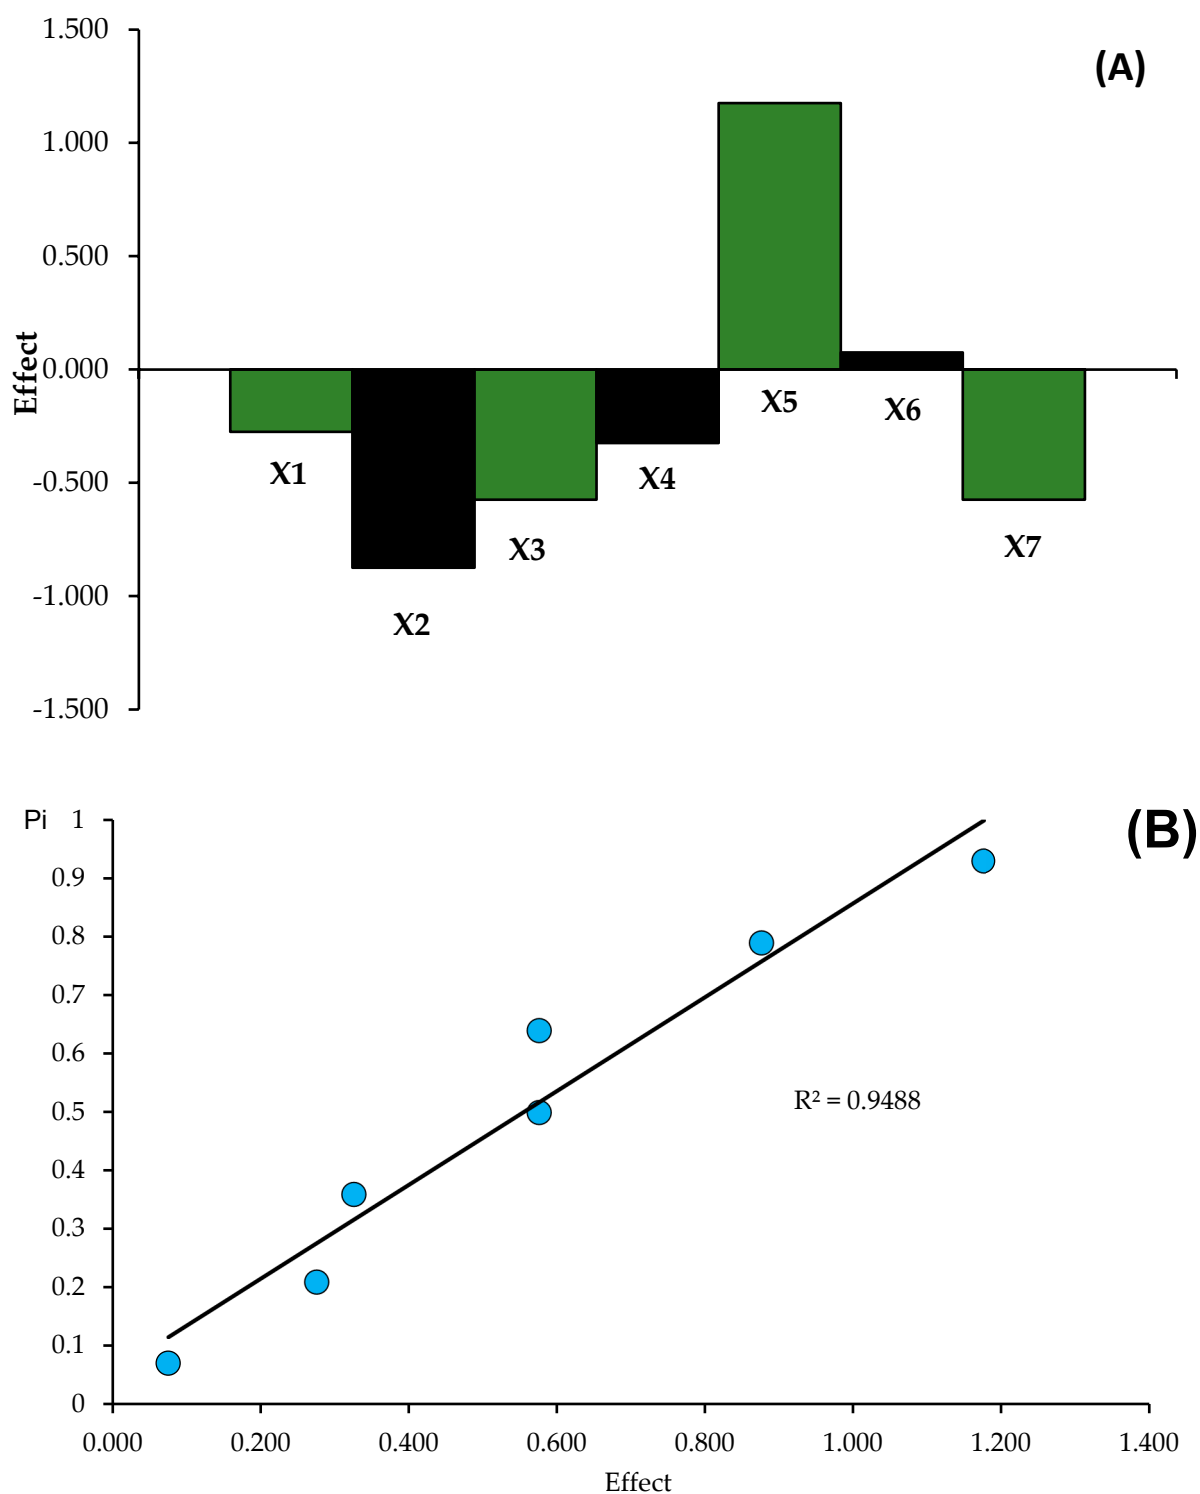

**Figure S16.** Robustness test: the effects of factors (A), and half-normal probability plot of effects (B) for determination of caffeine (C) in Saridon tablets.

**Table S4.** Literature values of LOD and LOQ of PA, PP, and C investigated by HPLC and micellar liquid chromatography techniques.

| Method                                                  | Stationary phase    | Mobile phase                                                    | LOD and LOQ [ $\mu\text{g/mL}$ ] of |                           |                          | Ref  |
|---------------------------------------------------------|---------------------|-----------------------------------------------------------------|-------------------------------------|---------------------------|--------------------------|------|
|                                                         |                     |                                                                 | PA                                  | PP                        | C                        |      |
| RP-HPLC                                                 | Nucleosil C18       | Water + methanol, 20:80, v/v)                                   | LOD: 0.30<br>LOQ: 0.88              | LOD: 0.25<br>LOQ: 0.41    | LOD: 0.36<br>LOQ: 0.66   | [20] |
| RP-HPLC                                                 | ODS column          | Ortho phosphoric acid 0.1% + acetonitrile, 85:15, v/v           | LOD: 0.18<br>LOQ: 0.55              | LOD: 0.05<br>LOQ: 0.14    | LOD: 0.03<br>LOQ: 0.09   | [22] |
| RP-HPLC                                                 | Hypersil C18 BDS    | 0.2 mol/L Tetrabutylammonium bisulphate + methanol, 100:45, v/v | LOD: 2.20<br>LOQ: 4.60              | LOD: 0.09<br>LOQ: 0.12    | LOD: 0.42<br>LOQ: 0.62   | [23] |
| RP-HPLC                                                 | C18 column          | Acetonitrile+methanol+water (25:25:50 v/v)                      | LOD: 6.57<br>LOQ: 19.90             | LOD = 5.19<br>LOQ = 15.74 | LOD: 3.098<br>LOQ: 0.39  | [24] |
| RP-HPLC                                                 | Chromolith RP-18e   | Acetonitrile + water (30:70 v/v)                                | LOD: 0.4<br>LOQ: 1.2                | LOD: 0.7<br>LOQ: 2.4      | LOD: 0.5<br>LOQ: 1.6     | [25] |
| RP-HPLC                                                 | C18 column          | Phosphate buffer (pH 9; 0.05 M) : methanol(80:20 v/v)           | LOD: 0,3<br>LOQ: 1                  | -                         | LOD: 0,3<br>LOQ: 1       | [13] |
| RP-HPLC                                                 | C18 column          | Methanol+water, 40:60, v/v                                      | LOD: 0.01<br>LOQ: 0.033             | -                         | LOD: 0.005<br>LOQ: 0.016 | [7]  |
| RP-HPLC                                                 | Hypersil C18 BDS    | 0.02 M tetrabutylammonium bisulfate : methanol (100:45 v/v)     | LOD: 2.20<br>LOQ: 4.40              | -                         | LOD: 0.42<br>LOQ: 0.62   | [6]  |
| RP-HPLC-UV                                              | $\mu$ -Bondapak C18 | Methanol+water+triethylamine (60+40+0.1, v/v)                   | -                                   | LOD: 5.0<br>LOQ: 8.0      | LOD: 1.5<br>LOQ: 5.0     | [17] |
| LC                                                      | Cyanopropyl column  | Acetonitrile +12mM ammonium acetate(25;75 v/v)                  | -                                   | LOD: 0.0065<br>LOQ: 0.022 | LOD: 0.004<br>LOQ: 0.013 | [15] |
| Micellar electrokinetic capillary liquid chromatography | Silica capillary    | 20 mM borate buffer                                             | LOD: 0.6<br>LOQ: 2.0                | LOD: 0.8<br>LOQ: 3.0      | LOD: 0.6<br>LOQ: 3.0     | [31] |

---

|           |         |                         |   |   |          |      |
|-----------|---------|-------------------------|---|---|----------|------|
| Micellar  |         | 40mM sodium dodecyl     |   |   |          |      |
| liquid    |         | sulphate                |   |   | LOD: 0.6 |      |
| chromatog | ODS C18 | + 10% propan-1-ol       | - | - | LOQ: 0.8 | [42] |
| raphy     |         | + 0,3% triethylamine in |   |   |          |      |
|           |         | 0,02 M phosphoric acid  |   |   |          |      |

---
